# Supplementary material for: Left atrial myxoma metastasizing to the brain: a case report and review of literature
Source: PubMed Central journal article supplement — Radiat Oncol J. 2024 Dec 20;42(4):330–4. doi: 10.3857/roj.2024.00395 (PMC11701465; doi:10.3857/roj.2024.00395), 2024-12-20
Supplement: roj-2024-00395-Supplementary-Table-1.pdf [file roj-2024-00395-Supplementary-Table-1.pdf]

**Table S1.** Cardiac myxomas metastasizing to the brain reported in literature

| Study year                   | Country   | Total number of patients | Age (yr) | Sex | Family Hx (Carney complex, other, etc.) | Location of cardiac myxoma & size (if known)            | Cardiac myxoma histopathology                                                                                                                                                     | Clinical/admission presentation                                                               | Method of detection (CT/MRI, other)                                                                                       | Location of brain lesions                                                  | Brain lesion histopathology                                                                                                                                                                                                                                    | Interval; primary resection to recurrence (mo)   | Other sites of metastasis                                                            | Surgery for brain lesions | Radio-therapy | Chemo-therapy | Other interventions   | Outcome follow-up (mo) |
|------------------------------|-----------|--------------------------|----------|-----|-----------------------------------------|---------------------------------------------------------|-----------------------------------------------------------------------------------------------------------------------------------------------------------------------------------|-----------------------------------------------------------------------------------------------|---------------------------------------------------------------------------------------------------------------------------|----------------------------------------------------------------------------|----------------------------------------------------------------------------------------------------------------------------------------------------------------------------------------------------------------------------------------------------------------|--------------------------------------------------|--------------------------------------------------------------------------------------|---------------------------|---------------|---------------|-----------------------|------------------------|
| Steinmetz et al. [1], 1973   | USA       | 1                        | 48       | F   | N/A                                     | Left atrium, from superior fossa ovals (6.5 x 2 x 1 cm) | Round and polygonal cells with abundant cytoplasm and indistinct margins. No mitotic activity was seen.                                                                           | Weakness of the left arm of 6 months duration.                                                | Brain scan: uptake of isotope in right cerebral hemisphere, with labelling of small area in right superior parietal lobe  | Right parietal lobe, left lateral cerebellum, right superior frontal gyrus | Post-mortem pathology: Meningeal vessels contained myxomatous cells and eosinophilic myxoid stroma like those seen in the heart; tumor cells occluded the lumen of numerous vessels; vessels occluded with tumor were found mostly in the sub-arachnoid space. | -2 (primary NOT resection)                       | No                                                                                   | No                        | No            | N/A           | DOD2                  |                        |
| Rankin and Desousa [2], 1978 | USA       | 1                        | 44       | F   | N/A                                     | Left atrial myxoma (6 x 3 x 2 cm)                       | N/A                                                                                                                                                                               | 3 months with severe left-sided headache, vomiting, & episode of unexplained unconsciousness. | CT: mass deep within left temporal area                                                                                   | Left lateral ventricle, choroid plexus                                     | Large, almost sinusoidal blood vessels; sleeves of myxomatous tissue with occasional connective tissue support; nuclei were uniformly small and without mitoses.                                                                                               | 96 mo                                            | Multiple bone (both humeri, pelvis, skull proximal femora, left scapula, left tibia) | Yes                       | No            | No            | N/A                   | Died 6 yr later        |
| Frank et al. [4], 1979       | USA       | 1                        | 49       | F   | N/A                                     | Atrial myxoma attached to superior rim of foramen ovale | Cords and nests of cells set in a pale, delicate stroma that was faintly positive with periodic acid-Schiff staining; conspicuous nuclear pleomorphisms; several mitotic figures. | 6-month history of progressive deficits in memory, concentration; vertigo, unsteady gait.     | CT: multiple well-circumscribed high-density contrast-enhancing lesions in posterior regions of both cerebral hemispheres | Right posterior parietal, left occipital regions                           | "Myxoid" tissue containing nests of cells with pleomorphic nuclei and variable amounts of cytoplasm.                                                                                                                                                           | -1 (primary NOT resection); 3 mo after resection | Right cerebral hemisphere                                                            | Yes                       | No            | No            | N/A                   | DOD6                   |
| Budzilovich et al. [5], 1979 | USA       | 1                        | 52       | F   | N/A                                     | Cardiac myxoma                                          | N/A                                                                                                                                                                               | N/A                                                                                           | CT: mass; myxoid invasion of neural tissue                                                                                | Cerebrum (parietal lobe), dura, cerebellum                                 | Myxoid invasion of neural tissue.                                                                                                                                                                                                                              | 0; Primary NOT resection (post-mortem)           | No                                                                                   | No                        | No            | N/A           | DOD0; Died on arrival |                        |
| Markel et al. [6], 1986      | USA       | 1                        | 18       | F   | N/A                                     | Left atrial myxoma; mitral valve                        | N/A                                                                                                                                                                               | N/A                                                                                           | N/A                                                                                                                       | Brain                                                                      | N/A                                                                                                                                                                                                                                                            | 30                                               | Bone (humerus)                                                                       | No                        | No            | No            | N/A                   | AWD39                  |
| Kadota et al. [7], 1987      | Japan     | 1                        | 44       | M   | N/A                                     | Atrial myxoma                                           | N/A                                                                                                                                                                               | Sudden dysarthria & left hemiparesis.                                                         | CT: infarct/ring-enhancing mass                                                                                           | Cerebrum (left fronto-parietal region)                                     | Much cellularity was revealed and nuclei were large with mitoses.                                                                                                                                                                                              | 12                                               | Skin                                                                                 | Yes                       | No            | No            | N/A                   | NK                     |
| Bazin et al. [8], 1987       | France    | 1                        | 56       | F   | N/A                                     | Left atrial myxoma                                      | N/A                                                                                                                                                                               | N/A                                                                                           | CT: multiple high density enhancing lesions                                                                               | Cerebrum, cerebellum                                                       | Myxomatous features.                                                                                                                                                                                                                                           | 48                                               | No                                                                                   | No                        | No            | N/A           | NK                    |                        |
| de Moraes et al. [9], 1988   | Brazil    | 1                        | 73       | M   | N/A                                     | Left atrial myxoma                                      | Gland-like structures; epithelial-like nature was supported by TEM and IPX studies, which showed positivity for carcinoembryonic antigen and H blood substance.                   | Myocardial infarct & coronary emboli.                                                         | N/A                                                                                                                       | brain                                                                      | N/A                                                                                                                                                                                                                                                            | 0                                                | Kidney, pancreas, stomach                                                            | No                        | No            | No            | N/A                   | DOD0                   |
| Jungreis et al. [10], 1989   | USA       | 1                        | 34       | M   | N/A                                     | Left atrial myxoma                                      | N/A                                                                                                                                                                               | N/A                                                                                           | CT: expansion of temporal bone with scattered calcifications within tumor                                                 | Skull base (right temporal bone) tumor                                     | N/A                                                                                                                                                                                                                                                            | -60                                              | Distal branch of middle cerebral artery                                              | Yes                       | No            | No            | N/A                   | NK                     |
| Rupp et al. [11], 1989       | Hong Kong | 1                        | 54       | M   | N/A                                     | Left atrial myxoma                                      | Typical appearance of an atrial myxoma, with no sarcomatous elements present.                                                                                                     | Blurred vision (right homonymous hemianopsia, impaired visual acuity).                        | CT: left hyperdense space-occupying lesion in occipital region                                                            | left occipital region                                                      | Myxoma tissues, admixed with recent and old hemorrhages, hemosiderin deposits, and fibrosis. Tumor tissue consisted of islands of stellate and polygonal cells with scant eosinophilic cytoplasm.                                                              | 4 mo; 6 mo; 12 mo                                | No                                                                                   | No                        | No            | N/A           | AWD18                 |                        |

(Continued to the next page)

Table S1. Continued

| Study, year                   | Country     | Total number of patients | Age (yr) | Sex | Family Hx (Camey complex, other, etc) | Location of cardiac myxoma & size (if known)                                             | Cardiac myxoma histopathology                                                                                                                                                                        | Clinical/admission presentation              | Method of detection (CT/MRI, other)                                                                                                                                   | Location of brain lesions                       | Brain lesion histopathology                                                                                                                         | Interval: primary resection to recurrence (mo) | Other sites of metastasis                          | Surgery for brain lesions | Radio-therapy         | Chemo-therapy                                                   | Other inter-ventions | Outcome follow-up (mo)                                                              |
|-------------------------------|-------------|--------------------------|----------|-----|---------------------------------------|------------------------------------------------------------------------------------------|------------------------------------------------------------------------------------------------------------------------------------------------------------------------------------------------------|----------------------------------------------|-----------------------------------------------------------------------------------------------------------------------------------------------------------------------|-------------------------------------------------|-----------------------------------------------------------------------------------------------------------------------------------------------------|------------------------------------------------|----------------------------------------------------|---------------------------|-----------------------|-----------------------------------------------------------------|----------------------|-------------------------------------------------------------------------------------|
| Kotani et al. [13], 1991      | Japan       | 1                        | 48       | M   | N/A                                   | Left atrial myxoma, near the appendage                                                   | Typical benign myxoma.                                                                                                                                                                               | N/A                                          | N/A                                                                                                                                                                   | Intracranial tumor                              | N/A                                                                                                                                                 | 12                                             | skin (3 mo), soft tissue, aorta (4 mo), leg (3 mo) | Yes                       | No                    | No                                                              | N/A                  | DOD53                                                                               |
| Hufmann et al. [14], 1992     | Germany     | 12                       | 39       | F   | N/A                                   | Left atrial myxoma                                                                       | N/A                                                                                                                                                                                                  | Parinaud syndrome due to mesencephalic mass. | CT and MRI: lacunar infarct in left thalamus; suspected midbrain metastasis; slight ventricular enlargement; unspecific white matter lesions.                         | Midbrain                                        | N/A                                                                                                                                                 | N/A                                            | N/A                                                | No                        | No                    | No                                                              | N/A                  | AWD36                                                                               |
| Todo et al. [15], 1992        | Japan       | 1                        | 32       | F   | N/A                                   | Cardiac myxoma                                                                           | N/A                                                                                                                                                                                                  | N/A                                          | CT: heterogeneous density and partly cystic mass                                                                                                                      | cerebrum (right temporal lobe)                  | Sarcoma with a myxomatous change.                                                                                                                   | 10                                             | Jejunum                                            | Yes                       | Yes (total 60 Gy)     | No                                                              | N/A                  | DOD10                                                                               |
| Chozick et al. [16], 1992     | USA         | 1                        | 61       | F   | N/A                                   | Left atrial myxoma                                                                       | Poorly cellular neoplasm containing numerous small blood vessels surrounded by cuffs of spindle cells, in a loose myxoid matrix, with pigment filled histiocytes.                                    | Fever, fatigue, dyspnea on exertion.         | CT: non-enhancing, hyperdense lesion in the right frontal lobe with surrounding edema (1983)<br>CT and MRI: an enhancing mass lesion in the right frontal lobe (1990) | cerebrum (right frontal lobe)                   | Neoplastic astrocytic proliferation with mitoses, vascular proliferation, and hemorrhage consistent with a malignant astrocytoma, Grade 2/3 (1990). | 8mo; 72mo                                      | No                                                 | Yes                       | No (1983); Yes (1990) | No                                                              | Steroids (1990)      | NED?; discharged to nursing home after several months in rehab for left hemiparesis |
| Kanda et al. [17], 1993       | Japan       | 1                        | 70       | M   | N/A                                   | Left atrial myxoma (50 x 40 x 40 mm)                                                     | Yellowish-red, elastic-hard, polypoid mass; tumor cells were spindle-shaped or stellate and contained vascular structures.                                                                           | Left hemiparesis.                            | CT: two masses in left & right parietal lobes                                                                                                                         | Cerebrum (left and right parietal lobe)         | Polygonal structures including round or spindle cells surrounded by a mucoid matrix.                                                                | -7 (primary NOT resection)                     | No                                                 | Yes                       | No                    | No                                                              | N/A                  | NED9                                                                                |
| Chen et al. [18], 1993        | China       | 1                        | 68       | F   | N/A                                   | Left atrial myxoma                                                                       | N/A                                                                                                                                                                                                  | Headache, visual disturbances.               | N/A                                                                                                                                                                   | Left occipital lobe                             | Presence of myxoma invasion of the vascular wall with aneurysmal formation and organized hematoma.                                                  | 12                                             | N/A                                                | Yes                       | No                    | No                                                              | N/A                  | AWD24                                                                               |
| Samaratunga et al. [19], 1994 | Australia   | 1                        | 60       | F   | N/A                                   | Left atrial myxoma at septum (50x45x20 mm)                                               | Spindled cells in a myxoid matrix that contains some fibrin; polygonal and stellate cells that formed small, solid nests and cords.                                                                  | 15-month history of Jacksonian seizures.     | CT: enhancing subcortical lesion high in left anterior parietal lobe                                                                                                  | Cerebrum (anterior part of parietal lobe)       | Spindled and polygonal cells arranged singly and in groups in a myxoid matrix; some groups of tumor cells form vascular channels.                   | -7, primary NOT resection                      | No                                                 | Yes                       | No                    | No                                                              | N/A                  | NED21                                                                               |
| Scarpelli et al. [20], 1997   | Italy       | 1                        | 64       | M   | N/A                                   | Cardiac myxoma                                                                           | N/A                                                                                                                                                                                                  | N/A                                          | N/A                                                                                                                                                                   | Cerebrum (right parieto-occipital)              | Metastatic atrial myxoma: glandular variant.                                                                                                        | 144                                            | No                                                 | Yes                       | No                    | No                                                              | N/A                  | NK                                                                                  |
| Bennet et al. [21], 1998      | Switzerland | 1                        | 31       | N/A | N/A                                   | Left atrial myxoma originating from interatrial septum (4 x 6 x 4 cm)                    | Macroscopically polypoid, multilobulated, and friable; tumor included a large amount of spindle and polygonal cells with polymorphic and hyperchromatic nuclei and demonstrated a high mitotic rate. | Fever, exertional dyspnea.                   | CT: multiple frontal & occipital bilateral metastases                                                                                                                 | Cerebrum (bilateral frontal, occipital regions) | N/A                                                                                                                                                 | 2                                              | Scapula, gastrocnemius, right lung                 | No                        | Yes (5,000 Gy)        | Yes (5 courses of chemotherapy with doxorubicin and ifosfamide) | N/A                  | NED120                                                                              |
| Hou et al. [22], 2001         | Taiwan      | 1                        | 37       | F   | N/A                                   | Left atrial myxoma                                                                       | Myxoid sarcoma.                                                                                                                                                                                      | Left ankle tumor                             | CT: brain tumor in left posterior frontal lobe                                                                                                                        | Posterior frontal lobe                          | N/A                                                                                                                                                 | 10                                             | Ankle, neck, left forearm, chest wall              | No                        | No                    | No                                                              | N/A                  | DOD12                                                                               |
| Ackel et al. [23], 2004       | Turkey      | 1                        | 58       | F   | N/A                                   | Left atrial myxoma (prolapsing through mitral valve into LV during diastole; 3.5 x 6 cm) | N/A                                                                                                                                                                                                  | Syncope, episodes of palpitation, cough.     | CT: low-density areas in left frontal and parietal regions                                                                                                            | Left frontal & parietal regions                 | N/A                                                                                                                                                 | 0                                              | No                                                 | No                        | No                    | No                                                              | Physical therapy     | NK                                                                                  |

(Continued to the next page)

Table S1. Continued

| Study, year                  | Country | Total number of patients | Age (yr) | Sex | Family Hx (Camey complex, other, etc) | Location of cardiac myxoma & size (if known)          | Cardiac myxoma histopathology                                                                                                                                                                                                        | Clinical/admission presentation                                                                               | Method of detection (CT/MRI, other)                                                                                                                                                                                                                                                                                        | Location of brain lesions                                                                    | Brain lesion histopathology                                                                                                                                                                                                                                                                                                                                                                                        | Interval: primary resection to recurrence (mo)                    | Other sites of metastasis  | Surgery for brain lesions | Radio-therapy                       | Chemo-therapy                            | Other interventions        | Outcome follow-up (mo)                                        |      |
|------------------------------|---------|--------------------------|----------|-----|---------------------------------------|-------------------------------------------------------|--------------------------------------------------------------------------------------------------------------------------------------------------------------------------------------------------------------------------------------|---------------------------------------------------------------------------------------------------------------|----------------------------------------------------------------------------------------------------------------------------------------------------------------------------------------------------------------------------------------------------------------------------------------------------------------------------|----------------------------------------------------------------------------------------------|--------------------------------------------------------------------------------------------------------------------------------------------------------------------------------------------------------------------------------------------------------------------------------------------------------------------------------------------------------------------------------------------------------------------|-------------------------------------------------------------------|----------------------------|---------------------------|-------------------------------------|------------------------------------------|----------------------------|---------------------------------------------------------------|------|
| Hrudayaraj et al. [24], 2004 | UK      | 1                        | 50       | F   | N/A                                   | Left atrial myxoma                                    | Vascularised myxoid neoplasm without mitotic activity or significant pleomorphism.                                                                                                                                                   | 1 month history of transient left arm weakness.                                                               | MRI: strongly enhancing lobulated 4 cm soft tissue mass in the right parietal region suggestive of a meningioma                                                                                                                                                                                                            | Right parietal region                                                                        | Vascular tumour with fibroblastic areas, some ectatic vascular channels and evidence of haemorrhage with very mild cytological pleomorphism without mitoses.                                                                                                                                                                                                                                                       | -1 (primary NOT resection)                                        | No                         | Yes                       | No                                  | No                                       | Yes (dexamethasone)        | NED24                                                         |      |
| Altundag et al. [25], 2005   | Turkey  | 1                        | 41       | F   | N/A                                   | Left atrial myxoma                                    | Histopathologic diagnosis was reported as "benign myxoma."                                                                                                                                                                           | Palpitation, exertional dyspnea                                                                               | MRI: multiple hemorrhagic lesions (largest one with 3cm diameter) located in both cerebrum and cerebellum. Right parietal lesion was excised to confirm the diagnosis.                                                                                                                                                     | Multiple lesions in cerebrum, cerebellum                                                     | Pathologic diagnosis was again reported as benign myxoma consistent with emboli.                                                                                                                                                                                                                                                                                                                                   | 15                                                                | No                         | Yes                       | No                                  | N/A                                      | N/A                        | AWD63 (cranial lesions did not change in size or number)      |      |
| Rodriguez et al. [26], 2006  | UK      | 1                        | 65       | F   | N/A                                   | Left atrial myxoma                                    | N/A                                                                                                                                                                                                                                  | Local focal seizures, hemiparesis.                                                                            | CT: two lesions in the right parietal lobe (1989)<br>CT: lesions bilaterally on occipital lobes (2004)                                                                                                                                                                                                                     | Right parietal lobe                                                                          | The macroscopic appearance revealed a well-circumscribed mass measuring 35 x 20 x 20 mm, the centre of which largely contained clot; histologically, the lesion showed features consistent with atrial myxoma as seen in the previous specimens                                                                                                                                                                    | 12 mo; 72 mo                                                      | No                         | Yes                       | No                                  | N/A                                      | N/A                        | AWD at the time of writing                                    |      |
| Rodriguez et al. [27], 2006  | USA     | 1                        | 41       | F   | N/A                                   | Small atrial septal lesion diagnosed as atrial myxoma | N/A                                                                                                                                                                                                                                  | 12-month history of transient left-sided paraesthesia and a 5-month history of recurrent visual disturbances. | MRI: multiple areas of decreased T2 signal within the frontal lobes bilaterally and the left parietal cortex (2001)<br>MRI: 3cm lesion in lateral aspect of anterior right frontal lobe (2003)                                                                                                                             | Frontal & parietal lobe                                                                      | Hypocellular proliferation of bland stellate to spindle cells lacking pleomorphism, hyperchromatism and mitotic activity immersed in a myxoid background. Stellate cells stained with calretinin and vimentin by immunohistochemistry; power photomicrograph from the centre of the parietal specimen showed a paucicellular proliferation of stellate and spindle cells in a mucoid background typical of myxoma. | -21 (primary NOT resection); atrial myxoma missed multiple times) | Bone (right pelvis, femur) | Yes                       | No                                  | No                                       | Prednisone for AWD23       | (wrong diagnosis); discontinued after 6 mo for poor tolerance |      |
| Mojiyali et al. [28], 2007   | India   | 1                        | 35       | M   | N/A                                   | Left atrial myxoma                                    | Immunohistochemistry of both the primary cardiac tumour and metastatic tumour demonstrated identical patterns with strong cyokeratin positivity in the glandular epithelium surrounded by stromal component highlighted by vimentin. | 4-yr history of left facio-brachial focal motor seizures unresponsive to anti-epileptic drugs.                | MRI: multiple lesions of heterogeneous intensity, partly solid and cystic situated in the right fronto-parietal, left temporal and occipital lobes<br>Repeat CT: two more lesions, one in the right parietal lobe just posterior to the previous large posterior frontal mass, as well as another in the left frontal lobe | Right fronto-parietal, left temporal, and occipital lobes; right parietal, left frontal lobe | Prominent glandular differentiation, identical in morphology to the primary cardiac lesion of a glandular variant of atrial myxoma.                                                                                                                                                                                                                                                                                | 48 (primary NOT resection)                                        | No                         | Yes                       | No                                  | Yes (focal radiotherapy to brain, 25 Gy) | N/A                        | N/A                                                           | AWD6 |
| Suzuki et al. [29], 2008     | Japan   | 1                        | 68       | M   | N/A                                   | Left atrial myxoma                                    | N/A                                                                                                                                                                                                                                  | Cerebral infarction.                                                                                          | CT: multiple high-density areas                                                                                                                                                                                                                                                                                            | N/A                                                                                          | N/A                                                                                                                                                                                                                                                                                                                                                                                                                | 6                                                                 | No                         | Yes                       | Yes (40.8 Gy whole brain radiation) | No                                       | N/A                        | Alive                                                         |      |
| Kumar et al. [30], 2011      | India   | 1                        | 30       | F   | N/A                                   | Left atrial myxoma                                    | N/A                                                                                                                                                                                                                                  | Generalized tonic-clonic convulsions, transient loss of memory.                                               | CT: multiple hemorrhages in different regions<br>MRI: hypointense lesions                                                                                                                                                                                                                                                  | Brain                                                                                        | Histopathology was consistent with myxomatous lesions.                                                                                                                                                                                                                                                                                                                                                             | 24 mo                                                             | No                         | Yes                       | No                                  | No                                       | long-term anti-ticoulsants | NK                                                            |      |

(Continued to the next page)

Table S1. Continued

| Study, year                | Country     | Total number of patients | Age (yr) | Sex | Family Hx (Camey complex, other, etc) | Location of cardiac myxoma & size (if known)                                                                                                                | Cardiac myxoma histopathology                                                                                                                                                                                                                                                                                                                  | Clinical/admission presentation                                         | Method of detection (CT/MRI, other)                                                                                                                                 | Location of brain lesions                                        | Brain lesion histopathology                                                                                                                                                                                                                                                                                                                                                                                          | Interval: primary resection to recurrence (mo) | Other sites of metastasis | Surgery for brain lesions | Radio-therapy                                                                                                                                           | Chemo-therapy | Other inter-ventions | Outcome follow-up (mo) |                                                 |
|----------------------------|-------------|--------------------------|----------|-----|---------------------------------------|-------------------------------------------------------------------------------------------------------------------------------------------------------------|------------------------------------------------------------------------------------------------------------------------------------------------------------------------------------------------------------------------------------------------------------------------------------------------------------------------------------------------|-------------------------------------------------------------------------|---------------------------------------------------------------------------------------------------------------------------------------------------------------------|------------------------------------------------------------------|----------------------------------------------------------------------------------------------------------------------------------------------------------------------------------------------------------------------------------------------------------------------------------------------------------------------------------------------------------------------------------------------------------------------|------------------------------------------------|---------------------------|---------------------------|---------------------------------------------------------------------------------------------------------------------------------------------------------|---------------|----------------------|------------------------|-------------------------------------------------|
| Kim et al. [31], 2011      | South Korea | 1                        | 49       | F   | N/A                                   | Left atrial myxoma                                                                                                                                          | Microscopic findings showed spindle and stellate cells with eosinophilic cytoplasm without significant cytologic atypia.                                                                                                                                                                                                                       | Sudden onset of left side weakness.                                     | MRI: multifocal areas of high signal intensity (S1) in bilateral cerebral hemispheres, cerebellar hemispheres, pons, and right thalamus.                            | Cerebrum (bilateral cerebral hemispheres)                        | N/A                                                                                                                                                                                                                                                                                                                                                                                                                  | 12                                             | No                        | No                        | Whole brain radiation treatment 35 Gy/24 fractions for 3 weeks and follow-up MRI revealed slight improvement of the multiple enhancing cerebral lesions | No            | N/A                  | NK                     |                                                 |
| Lee et al. [32], 2011      | Taiwan      | 1                        | 33       | F   | N/A                                   | Multiple tumors in the left atrium, measuring 2.9 x 3.0 cm, 2.0 x 3.0 cm, and 4.3 x 2.3 cm, respectively; malignant cardiac myxoma (myxosarcoma) diagnosis. | Spindle cells set within a myxoid ground substance with transition to pleomorphic and hyperchromatic cells arranged in solid sheets. Immunohistochemical studies showed positive staining for smooth muscle actin and HHF35, and focally for desmin. Stainings for myoglobin, myogenin, myoD1, S100, CD31, CD34, and calretinin were negative. | 2-mo history of intermittent productive cough, palpitation and dyspnea. | CT: multiple mass-like lesions in the left frontoparietal, left occipital and right high parietal regions. MRI and MRA: multiple intracranial tumors and aneurysms. | Left frontoparietal, left occipital, right high parietal regions | Tumor showed brain tissues infiltrated with neoplastic spindle cells that were similar to those of the cardiac tumor; the immunohistochemical staining results were also the same.                                                                                                                                                                                                                                   | 12                                             | No                        | Yes                       | radiotherapy (4,500 cGy/25 fractions)                                                                                                                   | Yes           | N/A                  | N/A                    | DOD 1w after admission due to brainstem failure |
| Badriyah et al. [33], 2012 | Malaysia    | 1                        | 15       | F   | N/A                                   | Left atrial myxoma                                                                                                                                          | N/A                                                                                                                                                                                                                                                                                                                                            | Progressive right-sided headache, nausea, vomiting.                     | CT: multiple enhancing solid-cystic lesions with significant perilesional edema                                                                                     | Cerebrum (right parietal and occipital lobes)                    | Circumscribed fragments of fibrocollagenous tissue with extensive area of hemorrhage. Under light microscopy, myxomatous component is seen. It is characteristically composed of stellate or fusiform shaped cells surrounded by loose stroma with abundant basophil cells infiltration. Tying together the patient's background history of atrial myxoma, the lesion represents metastasis from its cardiac origin. | 36                                             | No                        | Yes                       | No                                                                                                                                                      | No            | N/A                  | N/A                    | NED/2                                           |

(Continued to the next page)

**Table S1. Continued**

| Study, year                  | Country  | Total number of patients | Age (yr) | Sex | Family Hx (Camey complex, other, etc) | Location of cardiac myxoma & size (if known)                      | Cardiac myxoma histopathology                                                                                | Clinical/admission presentation                                                                                                              | Method of detection (CT/MRI, other)                                                                                                                                                                                                                                                                                                                                                                                                          | Location of brain lesions                                                 | Brain lesion histopathology                                                                                                                                                                                                                           | Interval: primary resection to recurrence (mo) | Other sites of metastasis | Surgery for brain lesions | Radio-therapy | Chemo-therapy                                                                                                                       | Other inter-ventions       | Outcome follow-up (mo) |
|------------------------------|----------|--------------------------|----------|-----|---------------------------------------|-------------------------------------------------------------------|--------------------------------------------------------------------------------------------------------------|----------------------------------------------------------------------------------------------------------------------------------------------|----------------------------------------------------------------------------------------------------------------------------------------------------------------------------------------------------------------------------------------------------------------------------------------------------------------------------------------------------------------------------------------------------------------------------------------------|---------------------------------------------------------------------------|-------------------------------------------------------------------------------------------------------------------------------------------------------------------------------------------------------------------------------------------------------|------------------------------------------------|---------------------------|---------------------------|---------------|-------------------------------------------------------------------------------------------------------------------------------------|----------------------------|------------------------|
| Raza et al. [34], 2012       | Pakistan | 1                        | 47       | F   | N/A                                   | Left atrial myxoma attached to intra-atrial septum (6 x 3 x 4 cm) | Histopathology report revealed the mass to be a benign atrial myxoma.                                        | New onset chest pain, dyspnea, on-and-off low grade fever for last 4 weeks.                                                                  | MR: multiple hyper-intense lesions with surrounding edema in the cerebellar and cerebral hemispheres bilaterally (Feb 2011)<br>Repeat MRI: growing contrast-enhancing, space-occupying left occipital haemorrhagic lesion, measuring 5.4 x 2.3cm and causing a midline shift (April 2011)<br>Repeat MRI: multiple cerebral and cerebellar haemorrhagic lesions, with the latter having grown considerably since previous imaging (July 2011) | Cerebrum, cerebellum                                                      | No myxomatous or malignant features were seen on histology.                                                                                                                                                                                           | 4; 6; 10; 13                                   | No                        | No                        | No            | Phenytoin for seizures (initial conservative management); steroids, mannitol (short course), oral tranexamic acid (600mg, 4x/3days) | AMD at the time of writing |                        |
| Radoi et al. [35], 2012      | Romania  | 1                        | 45       | M   | N/A                                   | Left atrial myxoma                                                | N/A                                                                                                          | Headache, nausea, gait disturbances and weakness of the left extremities. Two episodes of generalized seizures documented in previous month. | MR: three intracranial tumours, with calcification, located in both parietal and left frontal lobes                                                                                                                                                                                                                                                                                                                                          | Bilateral parietal lobes, left frontal lobe                               | Details of the stellate and spindle-shaped cells embedded in a loose eosinophilic matrix are obvious                                                                                                                                                  | 18                                             | No                        | Yes                       | N/A           | N/A                                                                                                                                 | AMD12                      |                        |
| Kierdaszuk et al. [36], 2014 | Poland   | 1                        | 41       | F   | N/A                                   | Left atrial myxoma, floating and fragmented                       | N/A                                                                                                          | Sudden onset of the left limb weakness which lasted for a few minutes.                                                                       | CT: seven heterogeneous haemorrhagic lesions surrounded by edema. The lesions were spread through both hemispheres - one in the right frontal lobe, one in the right parietal lobe, four in the left parietal lobe and one in the left occipital lobe<br>MRI: confirmed the presence of multiple lesions which were surrounded by edema and contained hemosiderin deposits                                                                   | Parietal lobes, right frontal lobe, left occipital lobe                   | Haemorrhagic areas with calcifications; chronic inflammation and hemosiderin-laden macrophages, and glial and mesodermal sequestration with vessel and collagen fiber calcifications.                                                                 | -6 (primary NOT resection)                     | Yes                       | No                        | N/A           | N/A                                                                                                                                 | AMD19                      |                        |
| Côté et al. [37], 2015       | Canada   | 1                        | 46       | F   | N/A                                   | Inter-atrial septal cardiac myxoma                                | Benign features such as a stellate or pseudo vascular pattern; a brown, lobed, well circumscribed structure. | 3-month history of seizures manifesting as paresis in left lower abdomen and upper thigh.                                                    | CT: three hypodense lesions surrounded by vasogenic oedema, interpreted as hemorrhagic<br>MRI: confirmed the presence of three hypointense lesions on T1 and gradient echo sequences                                                                                                                                                                                                                                                         | Right central sulcus, right inferior frontal gyrus, left precentral gyrus | Paucicellular, markedly myxoid lesion; spindle cells dispersed randomly and in perivascular and pseudo-vascular patterns on a myxoid background. Also present were hemosiderin-laden macrophages, Gamma-Dandy fibres, and multinucleated giant cells. | 24mo                                           | Yes                       | No                        | No            | Anticonvulsant therapy 1 year post-op (discontinued with no recurrent seizures)                                                     | AMD12                      |                        |
| Brijniji et al. [38], 2015   | USA      | 47                       | 41       | F   | N/A                                   | Cardiac myxoma                                                    | N/A                                                                                                          | Visual changes.                                                                                                                              | CT: intraparenchymal hemorrhagic with surrounding edema<br>MRI: hemorrhage with surrounding edema and mass effect and a thin enhancing rim<br>DSA: small fusiform aneurysm at a distal left middle cerebral artery branch                                                                                                                                                                                                                    | Right frontal lobe                                                        | Stellate and polygonal tumor cells surrounded by loose stroma with myxoid appearance.                                                                                                                                                                 | N/A                                            | Yes                       | N/A                       | N/A           | N/A                                                                                                                                 | NK                         |                        |

(Continued to the next page)

Table S1. Continued

| Study, year                    | Country | Total number of patients | Age (yr) | Sex | Family Hx (Carney complex, other, etc)                                                                                                                             | Location of cardiac myxoma & size (if known) | Cardiac myxoma histopathology                                                                                                                                                                                           | Clinical/admission presentation                                                | Method of detection (CT/MRI, other)                                                                                                                                                                                                                                                                                                             | Location of brain lesions                                                                                           | Brain lesion histopathology                                                                                                                                                                                                                                                                                   | Interval: primary resection to recurrence (mo) | Other sites of metastasis | Surgery for brain lesions | Radio-therapy                                                                    | Chemo-therapy | Other inter-ventions                                                            | Outcome follow-up (mo)         |
|--------------------------------|---------|--------------------------|----------|-----|--------------------------------------------------------------------------------------------------------------------------------------------------------------------|----------------------------------------------|-------------------------------------------------------------------------------------------------------------------------------------------------------------------------------------------------------------------------|--------------------------------------------------------------------------------|-------------------------------------------------------------------------------------------------------------------------------------------------------------------------------------------------------------------------------------------------------------------------------------------------------------------------------------------------|---------------------------------------------------------------------------------------------------------------------|---------------------------------------------------------------------------------------------------------------------------------------------------------------------------------------------------------------------------------------------------------------------------------------------------------------|------------------------------------------------|---------------------------|---------------------------|----------------------------------------------------------------------------------|---------------|---------------------------------------------------------------------------------|--------------------------------|
|                                | USA     |                          | 34       | F   | N/A                                                                                                                                                                | Left atrial myxoma                           | N/A                                                                                                                                                                                                                     | Acute thalamic infarction, headache.                                           | Pre- and post-contrast T1: two enhancing lesions in the posteromedial left temporal and posterior left occipital lobes<br>Gradient echo: hypo-intensity with 'blooming' in the two lesions consistent with blood products<br>FLAIR: moderate edema signal surrounding the left posterior temporal lesion<br>DSA: two oncotic fusiform aneurysms | Left temporal and posterior left occipital lobes                                                                    | N/A                                                                                                                                                                                                                                                                                                           | 24                                             | N/A                       | N/A                       | N/A                                                                              | N/A           | N/A                                                                             | NK                             |
| Rose et al. [39], 2016         | UK      | 2                        | 44       | M   | N/A                                                                                                                                                                | Left atrial myxoma (10.5 x 3.4 cm)           | Myxomatous matrix containing stellate or myxoma cells.                                                                                                                                                                  | Slurred speech, headache associated with blurred vision, nausea, and vomiting. | CT and MR: multiple lesions with mixed irregularities and distortion of the fourth ventricle. There was no evidence of hydrocephalus.<br>MR angiography: confirmed metastatic aneurysmal deposits with tumor emboli.                                                                                                                            | Cerebrum, cerebellum                                                                                                | N/A                                                                                                                                                                                                                                                                                                           | 5                                              | No                        | No                        | Yes (whole brain radio-therapy, 30Gy in 15 fractions)                            | No            | Dexamethasone 4 mg 2x/daily                                                     | DOD17                          |
|                                | UK      |                          | 52       | F   | N/A                                                                                                                                                                | Left atrial myxoma                           | N/A                                                                                                                                                                                                                     | Breathlessness                                                                 | CT and MRI: multiple brain lesions                                                                                                                                                                                                                                                                                                              | Cerebrum, cerebellum                                                                                                | N/A                                                                                                                                                                                                                                                                                                           | 0                                              | No                        | No                        | Yes (fosfamide and doxorubicin)                                                  | N/A           | N/A                                                                             | AWD6                           |
| Castano-Leon et al. [40], 2016 | Spain   | 1                        | 40       | F   | N/A                                                                                                                                                                | Left atrial myxoma (6.2 x 2.4 cm)            | Tumor cells arranged in an abundant mucoid stroma with a loose/cancellular pattern, minimal atypia; intense positive expression of calretinin.                                                                          | Vomiting and severe headache, palpitations, dyspnea.                           | MRI: four heterogeneous hemorrhagic supratentorial lesions with contrast enhancement and no mass effect                                                                                                                                                                                                                                         | Cerebrum (left pre-rolandic frontal gyrus, left superior parietal lobe, left occipital lobe); Cerebellum; Brainstem | Intrapancrechymal myxoma implants with the same benign histologic characteristics as the cardiac tumor; tumor cells were fusiform and dispersed in a mucin-rich myxoid matrix that stained strongly with alcian blue; calretinin expression in tumor cells was strong with a cytoplasmic and nuclear pattern. | 4                                              | No                        | Yes                       | Holocranial fraction radiotherapy (5 x 150 cGy) receiving a total dose of 35 Gy  | No            | N/A                                                                             | NED18                          |
| Roque et al. [41], 2019        | USA     | 1                        | 48       | F   | Whole exome sequencing of her tumor revealed multiple mutations in PRKAR1A not found in her germline DNA, suggesting that the myxoma in this patient was sporadic. | Left atrial myxoma (3.5 x 2.5 x 2.5 cm)      | Complex papillary structure comprising grape-like clusters organized into an arborizing network; myxoid matrix was interspersed with clusters and linear strings of cells comprising abortive endowell-like structures. | Daily headaches                                                                | MRI: small, scattered fluid-attenuated inversion recovery (FLAIR) hyperintensities and areas of susceptibility weighted imaging (SWI) signal intensity in her bilateral occipital lobes, right frontal lobe, and left parietal lobe.                                                                                                            | Bilateral parietal, frontal occipital lobes                                                                         | Clusters of rounded hyperchromatic cells displaying a lack of cohesion, forming small collections of cells separating from the surface of the myxoma; stained positively for SMA and CD31.                                                                                                                    | 12                                             | No                        | No                        | Yes (whole brain radiation with hippocampal sparing, 37.750 cGy in 15 fractions) | No            | 6 mo of methotrexate for prevention of cognitive dysfunction post-radio-therapy | AWD 18 (lesions stable on MRI) |

(Continued to the next page)

**Table S1. Continued**

| Study, year                  | Country | Total number of patients | Age (yr) | Sex | Family Hx (Camey complex, other, etc.) | Location of cardiac myxoma & size (if known) | Cardiac myxoma histopathology | Clinical/admission presentation                                                                          | Method of detection (CT/MRI, other)                                                                                                                                                                                                                | Location of brain lesions                                                 | Brain lesion histopathology                                                                                                                                                                                                                                                                                                                                 | Interval: primary resection to recurrence (mo) | Other sites of metastasis | Surgery for brain lesions                                                                                                                     | Radio-therapy | Chemo-therapy                   | Other inter-ventions                                                                                                              | Outcome follow-up (mo) |
|------------------------------|---------|--------------------------|----------|-----|----------------------------------------|----------------------------------------------|-------------------------------|----------------------------------------------------------------------------------------------------------|----------------------------------------------------------------------------------------------------------------------------------------------------------------------------------------------------------------------------------------------------|---------------------------------------------------------------------------|-------------------------------------------------------------------------------------------------------------------------------------------------------------------------------------------------------------------------------------------------------------------------------------------------------------------------------------------------------------|------------------------------------------------|---------------------------|-----------------------------------------------------------------------------------------------------------------------------------------------|---------------|---------------------------------|-----------------------------------------------------------------------------------------------------------------------------------|------------------------|
| Wan et al. [42], 2019        | China   | 1                        | 39       | F   | N/A                                    | Left atrial myxoma                           | N/A                           | 1 mo history of progressive, headaches with nausea, vomiting                                             | CT: heterogeneous hemorrhagic lesions surrounded by edema, largest on left frontal lobe<br>MRI, MRA, SWI: confirmed multiple brain metastases of myxoma & cerebral aneurysm formation from myxoma involving bilateral ACA, MCA, right PCA, and SCA | Multiple cerebral metastases                                              | Hematoxylin and eosin staining of both tissues disclosed typical atrial myxoma cells embedded in a loose myxoid matrix.                                                                                                                                                                                                                                     | 7                                              | No                        | No                                                                                                                                            | No            | Anti-platelet treatment post-op | AMD18 (brain lesions became smaller, but edema around them became larger than before and the metastatic aneurysms rarely changed) |                        |
| Ghoadsara et al. [43], 2020  | India   | 1                        | 63       | M   | N/A                                    | Left atrial myxoma                           | N/A                           | Moderate left-sided hemi-cranial headache for 1 mo, with associated vomiting, giddiness, gait imbalance. | MRI: left parieto-occipital multi-cystic hemorrhagic SOL with the potential of being a hemorrhagic metastasis or a cavernoma<br>Positron emission tomography: mildly hypermetabolic enhancing lesion in the left parieto-occipital area            | Left parieto-occipital region                                             | Hypocellular tumor with scattered bland spindle cells in basophilic matrix.                                                                                                                                                                                                                                                                                 | 12                                             | No                        | No                                                                                                                                            | N/A           | N/A                             | AMD at the time of writing                                                                                                        |                        |
| Rajeshwari et al. [44], 2020 | India   | 2                        | 56       | F   | N/A                                    | Left atrial myxoma (8 mm)                    | N/A                           | Recurrent episodes of sudden-onset neurological deficits and seizures for 1 yr.                          | CT and MRI: a left occipital hematoma with enhancing, an acute right parietal infarct and multiple chronic infarcts involving both the cerebral hemispheres and thalami                                                                            | Left occipital, right temporo-parietal, bilateral hemispheres and thalami | Thickened vessels showed the accumulation of an abundant myxoid material, highlighted by Alcian blue staining, in the tunica media with embedded stellate to spindle cells; stellate cells were immune-positive for calretinin while being immune-negative for alpha-smooth muscle actin (SMA), clinching the diagnosis of metastatic emboli from a myxoma. | -6                                             | No                        | No                                                                                                                                            | N/A           | N/A                             | DOD6                                                                                                                              |                        |
|                              | India   | 17                       |          | M   | Negative Fx                            | Left atrial myxoma                           | N/A                           | Right muscle weakness and seizures for 6 months, and headache and vomiting for 2 days.                   | MRI: multiple space-occupying lesions in the left fronto-temporo-occipital regions with the largest lesion in the left frontotemporal lobe                                                                                                         | Left fronto-temporo-occipital region                                      | Stellate to fusiform cells scattered in the abundant myxoid matrix and at places closely associated with capillaries.                                                                                                                                                                                                                                       | 18                                             | No                        | Yes (10 cycles of whole brain radio-therapy planned at 30 Gy, completed 8 and re-admitted with increased ICP that was conservatively managed) | N/A           | N/A                             | N/A (patient lost after discharge)                                                                                                |                        |
| Maas et al. [45], 2020       | USA     | 1                        | 62       | M   | N/A                                    | Left atrial myxoma (4.2 x 2.4 cm)            | N/A                           | Mild chest discomfort, left arm numbness, visual changes, and gait instability.                          | MRI: enlarged heterogeneously enhancing hemorrhagic masses in the right posterior occipital-parietal region with increased vasogenic edema and mild mass-effect on the posterior horn of the right lateral ventricle                               | posterior occipital-parietal region                                       | N/A                                                                                                                                                                                                                                                                                                                                                         | 12                                             | Fingertips, lymphoma      | Yes                                                                                                                                           | No            | No                              | N/A                                                                                                                               | NED48                  |

(Continued to the next page)

Table S1. Continued

| Study, year               | Country      | Total number of patients | Age (yr) | Sex | Family Hx (Camey complex, other, etc) | Location of cardiac myxoma & size (if known)                                | Cardiac myxoma histopathology                                                                                                                                                                                             | Clinical/admission presentation                                                                             | Method of detection (CT/MRI, other)                                                                                                                                                                                                      | Location of brain lesions                | Brain lesion histopathology                                                                                                                                                                                                                                          | Interval; primary resection to recurrence (mo)                                  | Other sites of metastasis           | Surgery for brain lesions | Radio-therapy                                             | Chemo-therapy                                                                                                                                  | Other inter-ventions     | Outcome follow-up (mo) |
|---------------------------|--------------|--------------------------|----------|-----|---------------------------------------|-----------------------------------------------------------------------------|---------------------------------------------------------------------------------------------------------------------------------------------------------------------------------------------------------------------------|-------------------------------------------------------------------------------------------------------------|------------------------------------------------------------------------------------------------------------------------------------------------------------------------------------------------------------------------------------------|------------------------------------------|----------------------------------------------------------------------------------------------------------------------------------------------------------------------------------------------------------------------------------------------------------------------|---------------------------------------------------------------------------------|-------------------------------------|---------------------------|-----------------------------------------------------------|------------------------------------------------------------------------------------------------------------------------------------------------|--------------------------|------------------------|
| Panos et al. [46], 2020   | Switzerland  | 1                        | 63       | M   | N/A                                   | Cardiac myxoma attached to left interatrial septum (7 x 3 cm, 2.8 x 1.2 in) | Atrial tumor was of myxoid appearance, with hemorrhagic and cystic degeneration areas. The stellate cells with round, hyperchromatic nuclei, and scant, eosinophilic cytoplasm in a myxoid matrix are typical for myxoma. | Generalized tonic-clonic seizure; dysarthria; non-fluent partial aphasia.                                   | MRI: multiple supra- and infratentorial lesions with partial hemorrhagic transformation and gadolinium enhancement                                                                                                                       | Left parieto-occipital lesion            | Stellate myxoma cells and extensive regenerative changes with inflammation and signs of hemorrhage.                                                                                                                                                                  | 9                                                                               | N/A                                 | No                        | Fractionated whole-brain radiotherapy (10 cycles of 3 Gy) | Levetiracetam was switched to lamotrigine (target dose 3.5 mg/kg/day), quetiapine (0.3 mg/kg/day) was added, and dexamethasone was phased out. | Docamethasone (4 mg/day) | AWD36                  |
| Aguilar et al. [47], 2021 | Peru         | 1                        | 69       | F   | N/A                                   | Left atrial myxoma                                                          | Papillary pattern, benign histological features, and uniform expression of calretinin into the myxoma cells.                                                                                                              | Drug-resistant epilepsy for the past four months; acute left-sided hemiparesis, distal tremor in both hands | CT: cortical and subcortical hyperdense nodules surrounded by the vasogenic edema zone in the posterior fossa and cerebral hemispheres                                                                                                   | Frontal, occipital, cerebellar regions   | Abundant lepidic cells in a myxoid stroma infiltrating brain parenchyma; tumor cells exhibit nuclear pleomorphism and mitotic figures.                                                                                                                               | 10                                                                              | No                                  | No                        | No                                                        | No                                                                                                                                             | N/A                      | DOD30                  |
| Wang et al. [48], 2021    | China        | 1                        | 66       | F   | N/A                                   | Left atrial myxoma                                                          | N/A                                                                                                                                                                                                                       | Headache and numbness of the right hand for 2 weeks.                                                        | MRI: multiple brain lesions; cerebral tumors had variable and increased FDG uptake in general                                                                                                                                            | Left parietal lobe, right occipital lobe | Degenerated mucous cells.                                                                                                                                                                                                                                            | 6                                                                               | No                                  | Yes                       | No                                                        | No                                                                                                                                             | N/A                      | NK                     |
| Agely et al. [49], 2022   | Saudi Arabia | 1                        | 73       | M   | N/A                                   | Left atrial myxoma                                                          | N/A                                                                                                                                                                                                                       | Acute left-side weakness, slurred speech, gait imbalance.                                                   | CT: sellar/suprasellar mass with mild ventricular dilation                                                                                                                                                                               | Pituitary macroadenoma                   | N/A                                                                                                                                                                                                                                                                  | 0                                                                               | Lung, thyroid, adrenal glands, bone | No                        | No                                                        | No                                                                                                                                             | N/A                      | DOD3                   |
| Ma et al. [50], 2023      | China        | 1                        | 47       | F   | N/A                                   | Left atrial myxoma (27 x 13 mm)                                             | Immunohistochemical stain showed positive expression of CD34; small, plump, spindle to ovoid tumor cells with abundant eosinophilic cytoplasm and minimal cytological atypia.                                             | Convulsions in right hand, repeated generalized seizures (6x/month).                                        | CT: multiple rounded lesions in left frontal & parietal areas                                                                                                                                                                            | Cerebrum (left frontal, parietal lobes)  | Under light microscopy, myxomatous component was seen composed of stellate or fusiform shaped cells surrounded by loose stroma with abundant basophil cells infiltration.                                                                                            | 8 mo (primary NOT resection of atrial myxoma; pt denied surgery multiple times) | No                                  | Yes                       | Gamma knife radiosurgery                                  | Temozolomide 150 mg/m2 for 5 days                                                                                                              | N/A                      | AWD24                  |
| Samia et al. [51], 2023   | USA          | 1                        | 59       | M   | N/A                                   | left atrial-ventricular myxoma (5.5 x 4 x 3.7 cm)                           | Mass showed low cellularity and abundant extracellular matrix, papillary projections from the surface, and spindle-shaped and stellate cells without mitotic figures surrounded by a myxoid stroma.                       | Persistent headaches, visual changes, fatigue, word-finding difficulty                                      | CT and MRI: left occipital lobe mass measuring 2.0 x 2.1 x 2.3 cm with surrounding subacute and chronic hemorrhage, multiple other hemorrhagic lesions in the cerebral hemispheres and cerebellum, and multiple chronic lacunar infarcts | Left occipital lobe                      | Myxoid regions, areas of acute, subacute, and chronic hemorrhages, spindle-shaped and stellate cells, and macrophages containing hemosiderin. Alcian blue 2.5 pH staining showed that the extracellular matrix contains abundant acid mucin and mucopolysaccharides. | 2.5                                                                             | No                                  | Yes                       | No                                                        | No                                                                                                                                             | N/A                      | NK                     |

(Continued to the next page)



**Table S1. Continued**

| Study, year             | Country | Total number of patients | Age (yr) | Sex | Family Hx (Camey complex, other, etc.) | Location of cardiac myxoma & size (if known) | Cardiac myxoma histopathology                                                                                                                                                        | Clinical/admission presentation                                                                                   | Method of detection (CT/MRI, other)                                                                                                                                                                                          | Location of brain lesions                                                                                                   | Brain lesion histopathology                               | Interval: primary resection to recurrence (mo) | Other sites of metastasis | Surgery for brain lesions | Radio-therapy                                                             | Chemo-therapy | Other inter-ventions | Outcome follow-up (mo) |
|-------------------------|---------|--------------------------|----------|-----|----------------------------------------|----------------------------------------------|--------------------------------------------------------------------------------------------------------------------------------------------------------------------------------------|-------------------------------------------------------------------------------------------------------------------|------------------------------------------------------------------------------------------------------------------------------------------------------------------------------------------------------------------------------|-----------------------------------------------------------------------------------------------------------------------------|-----------------------------------------------------------|------------------------------------------------|---------------------------|---------------------------|---------------------------------------------------------------------------|---------------|----------------------|------------------------|
| Abdow et al. [52], 2023 | USA     | 1                        | 63       | F   | N/A                                    | Left atrial myxoma                           | N/A                                                                                                                                                                                  | Acute onset of left-sided facial droop, numbness, and weakness concerning for right middle cerebral artery stroke | CT: right frontal intracranial hemorrhage (ICH) in her stroke bed, as well as small left frontal and occipital ICHs.<br>MRI and MRA: multifocal hemorrhagic lesions in these areas concerning hemorrhagic metastatic lesions | left frontal and occipital lobes, right frontal lobe                                                                        | Myxoid neoplasm, consistent with intracranial metastasis. | 8                                              | No                        | Yes                       | Stereotactic radiosurgery (not successful in reducing multifocal lesions) | No            | N/A                  | AWD29                  |
| Our case                | Canada  | 1                        | 56       | F   | N/A                                    | Left atrial myxoma                           | Scalate and polygonal tumor cells within a myxoid stroma; prominent eosinophilic cytoplasm, blurred cellular borders, and ovoid nuclei featuring open chromatin and subtle nucleoli. | Headaches, right arm weakness, blurry vision.                                                                     | MRI: Popcorn-like lesions with areas of low and high intrinsic T1 signal intensity.                                                                                                                                          | Medial regions of the right frontal, parietal, and occipital lobes, as well as the medial left parietal and occipital lobes | N/A                                                       | 3                                              | No                        | No                        | Whole brain radiation treatment (20 Gy/5 fraction regimen)                | No            | N/A                  | AWD48                  |

AWD, alive with disease; DOD, died of disease; NED, no evidence of disease; NK, not known; N/A, not available  
See Table S2 for detailed information on all the studies listed in Table S1.
