# Supplementary material for: Left atrial myxoma metastasizing to the brain: a case report and review of literature
Source: PubMed Central journal article supplement — Radiat Oncol J. 2024 Dec 20;42(4):330–4. doi: 10.3857/roj.2024.00395 (PMC11701465; doi:10.3857/roj.2024.00395), 2024-12-20
Supplement: roj-2024-00395-Supplementary-Table-2.pdf [file roj-2024-00395-Supplementary-Table-2.pdf]

**Table S2.** List of included studies in Table S1

| No  | Source information                                                                                                                                                                                                  |
|-----|---------------------------------------------------------------------------------------------------------------------------------------------------------------------------------------------------------------------|
| 1.  | Steinmetz EF, Calanchini PR, Aguilar MJ. Left atrial myxoma as a neurological problem: a case report and review. <i>Stroke</i> 1973;4:451-8.                                                                        |
| 2.  | Desousa AL, Muller J, Campbell R, Batnitzky S, Rankin L. Atrial myxoma: a review of the neurological complications, metastases, and recurrences. <i>J Neurol Neurosurg Psychiatry</i> 1978;41:1119-24.              |
| 3.  | Seo IS, Warner TF, Colyer RA, Winkler RF. Metastasizing atrial myxoma. <i>Am J Surg Pathol</i> 1980;4:391-9.                                                                                                        |
| 4.  | Frank RA, Shalen PR, Harvey DG, Berg L, Ferguson TB, Schwartz HG. Atrial myxoma with intellectual decline and cerebral growths on CT scan. <i>Ann Neurol</i> 1979;5:396-400.                                        |
| 5.  | Budzilovich G, Aleksic S, Greco A, Fernandez J, Harris J, Finegold M. Malignant cardiac myxoma with cerebral metastases. <i>Surg Neurol</i> 1979;11:461-9.                                                          |
| 6.  | Markel ML, Armstrong WF, Waller BF, Mahomed Y. Left atrial myxoma with multicentric recurrence and evidence of metastases. <i>Am Heart J</i> 1986;111:409-13.                                                       |
| 7.  | Kadota T, Imakita S, Mitomo M, et al. Metastatic brain tumor of atrial myxoma. <i>Neuroradiology</i> 1987;29:218.                                                                                                   |
| 8.  | Bazin A, Peruzzi P, Baudrillard JC, Pluot M, Rousseaux P. Cardiac myxoma with cerebral metastases. <i>Neurochirurgie</i> 1987;33:487-9.                                                                             |
| 9.  | de Morais C, Falzoni R, Alves VA. Myocardial infarct due to a unique atrial myxoma with epithelial-like cells and systemic metastases. <i>Arch Pathol Lab Med</i> 1988;112:185-90.                                  |
| 10. | Jungreis CA, Sekhar LN, Martinez AJ, Hirsch BE. Cardiac myxoma metastatic to the temporal bone. <i>Radiology</i> 1989;170(1 Pt 1):244.                                                                              |
| 11. | Rupp GM, Heyman RA, Martinez AJ, Sekhar LN, Jungreis CA. The pathology of metastatic cardiac myxoma. <i>Am J Clin Pathol</i> 1989;91:221-7.                                                                         |
| 12. | Ng HK, Poon WS. Cardiac myxoma metastasizing to the brain: case report. <i>J Neurosurg</i> 1990;72:295-8.                                                                                                           |
| 13. | Kotani K, Matsuzawa Y, Funahashi T, et al. Left atrial myxoma metastasizing to the aorta, with intraluminal growth causing renovascular hypertension. <i>Cardiology</i> 1991;78:72-7.                               |
| 14. | Hofmann E, Becker T, Romberg-Hahnloser R, Reichmann H, Warmuth-Metz M, Nadjmi M. Cranial MRI and CT in patients with left atrial myxoma. <i>Neuroradiology</i> 1992;34:57-61.                                       |
| 15. | Todo T, Usui M, Nagashima K. Cerebral metastasis of malignant cardiac myxoma. <i>Surg Neurol</i> 1992;37:374-9.                                                                                                     |
| 16. | Chozick BS, Ambler MW, Stoll J Jr. Malignant astrocytoma six years after the resection of a cerebral metastatic cardiac myxoma: case report. <i>Neurosurgery</i> 1992;30:923-7.                                     |
| 17. | Kanda T, Sakamaki T, Murata K. A cardiac myxoma with interleukin-6 production and cerebral metastasis. <i>Int J Cardiol</i> 1994;45:144-6.                                                                          |
| 18. | Chen HJ, Liou CW, Chen L. Metastatic atrial myxoma presenting as intracranial aneurysms with hemorrhage: case report. <i>Surg Neurol</i> 1993;40:61-4.                                                              |
| 19. | Samaratunga H, Searle J, Cominos D, Le Fevre I. Cerebral metastasis of an atrial myxoma mimicking an epithelioid hemangioendothelioma. <i>Am J Surg Pathol</i> 1994;18:107-11.                                      |
| 20. | Scarpelli M, Montironi R, Ricciuti R, Vecchioni S, Pauri F. Cardiac myxoma with glandular elements metastatic to the brain 12 years after the removal of the original tumor. <i>Clin Neuropathol</i> 1997;16:190-4. |
| 21. | Bernet F, Stulz PM, Carrel TP. Long-term remission after resection, chemotherapy, and irradiation of a metastatic myxoma. <i>Ann Thorac Surg</i> 1998;66:1791-2.                                                    |
| 22. | Hou YC, Chang S, Lo HM, Hsiao CH, Lin FY. Recurrent cardiac myxoma with multiple distant metastasis and malignant change. <i>J Formos Med Assoc</i> 2001;100:63-5.                                                  |
| 23. | Acikel M, Yekeler I, Ates A, Erkut B. A giant left atrial myxoma: an unusual cause of syncope and cerebral emboli. <i>Int J Cardiol</i> 2004;94:325-6.                                                              |
| 24. | Hirudayaraj P, Arya B, Suvarna SK, Payne G, Palaniswamy A. Myxomatous meningeal tumour: a case of "metastatic" cardiac myxoma. <i>Int J Cardiol</i> 2004;96:471-3.                                                  |
| 25. | Altundag MB, Ertas G, Ucer AR, Durmus S, Abanuz H, Calikoğlu T, et al. Brain metastasis of cardiac myxoma: case report and review of the literature. <i>J Neurooncol</i> 2005;75:181-4.                             |
| 26. | Rodrigues D, Matthews N, Scoones D, Aziz F, Nath F. Recurrent cerebral metastasis from a cardiac myxoma: case report and review of literature. <i>Br J Neurosurg</i> 2006;20:318-20.                                |
| 27. | Rodriguez FJ, Brown RD, Mohr JP, et al. Embolic atrial myxoma with neoplastic aneurysm formation and haemorrhage: a diagnostic challenge. <i>Neuropathol Appl Neurobiol</i> 2006;32:213-6.                          |
| 28. | Moiyadi AV, Moiyadi AA, Sampath S, et al. Intracranial metastasis from a glandular variant of atrial myxoma. <i>Acta Neurochir (Wien)</i> 2007;149:1157-62.                                                         |
| 29. | Suzuki R, Watanabe T, Hirayama R, et al. Case with cardiac myxoma causing cerebral metastasis after cardiac tumor resection. <i>Kyobu Geka</i> 2008;61:456-9.                                                       |
| 30. | Kumar A, Deopujari CE, Karmarkar VS. A rare diagnosis of multiple hemorrhagic metastases in brain. <i>J Postgrad Med</i> 2011;57:214-7.                                                                             |
| 31. | Kim AH, Lee JW, Lee MK, Yoon PH, Kim MJ. Delayed cerebral metastases from completely resected cardiac myxoma: case report and review of literature. <i>J Korean Soc Magn Reson Med</i> 2011;15:165-9.               |
| 32. | Lee TH, Huang SC, Su TM, Yang KY, Rau CS. Multiple cerebral aneurysms and brain metastasis from primary cardiac myxosarcoma: a case report and literature review. <i>Chang Gung Med J</i> 2011;34:315-9.            |

(Continued to the next page)

Table S2. Continued

| No  | Source information                                                                                                                                                                                                                                                    |
|-----|-----------------------------------------------------------------------------------------------------------------------------------------------------------------------------------------------------------------------------------------------------------------------|
| 33. | Badrisyah I, Saiful R, Rahmat H, Naik VR, Tan YC. Brain metastasis of atrial myxoma: case report. <i>Med J Malaysia</i> 2012;67:613-5.                                                                                                                                |
| 34. | Raza E, Kamal AK. Recurrent non-aneurysmal, metastatic intraparenchymal haemorrhages following resection of atrial myxoma: case report and literature review. <i>BMJ Case Rep</i> 2012;2012:bcr0220125772.                                                            |
| 35. | Radoi MP, Stefanescu F, Arsene D. Brain metastases and multiple cerebral aneurysms from cardiac myxoma: case report and review of the literature. <i>Br J Neurosurg</i> 2012;26:893-5.                                                                                |
| 36. | Kierdaszuk B, Gogol P, Kolasa A, et al. Multiple metastatic intracranial lesions associated with left atrial myxoma. <i>Pol J Radiol</i> 2014;79:262-7.                                                                                                               |
| 37. | Cote I, Sinclair J, Woulfe J, Glikstein R, Veinot J. Cerebral metastasis presenting after complete primary resection of atrial myxoma: case report. <i>Can J Neurol Sci</i> 2015;42:457-60.                                                                           |
| 38. | Brinjikji W, Morris JM, Brown RD, et al. Neuroimaging findings in cardiac myxoma patients: a single-center case series of 47 patients. <i>Cerebrovasc Dis</i> 2015;40:35-44.                                                                                          |
| 39. | Rose D, Papa A, Tomao S, Greco E, Zacharias J. Cerebral metastases in patients with left atrial myxoma. <i>J Card Surg</i> 2016;31:289-93.                                                                                                                            |
| 40. | Castano-Leon AM, Hernandez-Lain A, Maronas L, et al. Pathology-confirmed cerebral arterial invasion and recurrent multiple brain metastasis from cardiac myxoma without evidence of disease after surgery and radiotherapy. <i>Clin Neuropathol</i> 2016;35:84-8.     |
| 41. | Roque A, Kimbrough T, Traner C, et al. Somatic PRKAR1A mutation in sporadic atrial myxoma with cerebral parenchymal metastases: a case report. <i>J Med Case Rep</i> 2019;13:389.                                                                                     |
| 42. | Wan Y, Du H, Zhang L, et al. Multiple cerebral metastases and metastatic aneurysms in patients with left atrial Myxoma: a case report. <i>BMC Neurol</i> 2019;19:249.                                                                                                 |
| 43. | Ghodasara SA, Balasubramanian R, Varadharajan S, Shobhanaa PS. Cardiac phoenix in the brain-occult intracranial hemorrhagic metastases from completely resected atrial myxoma. <i>Surg Neurol Int</i> 2020;11:383.                                                    |
| 44. | Rajeshwari M, Subramanian P, Suri V, et al. Metastatic lesions of atrial myxoma: a pathologist can clinch them all. <i>Neuropathology</i> 2020;40:295-301.                                                                                                            |
| 45. | Maas JA, Menes M, Siomin V. Cardiac myxoma with cerebral metastases and chronic lymphocytic leukemia/small lymphocytic lymphoma: a case report and review. <i>J Neurol Surg Rep</i> 2020;81:e1-6.                                                                     |
| 46. | Panos LD, Brunel C, Berezowska S, et al. Early and delayed neurological manifestations of cardiac myxomas. <i>Clin Neurol Neurosurg</i> 2020;190:105673.                                                                                                              |
| 47. | Aguilar C, Carbajal T, Beltran BE, Segura P, Muhammad S, Choque-Velasquez J. Cerebral embolization associated with parenchymal seeding of the left atrial myxoma: potential role of interleukin-6 and matrix metalloproteinases. <i>Neuropathology</i> 2021;41:49-57. |
| 48. | Wang P, Hou G, Li F, Cheng X. Hypermetabolic cerebral metastases of cardiac myxoma on FDG PET/CT. <i>Clin Nucl Med</i> 2021;46:146-7.                                                                                                                                 |
| 49. | Ageely GA, Alsulami SS, Alkenani AA, Albeshri EE. Cardiac myxoma presenting with multisystem involvement. <i>Saudi Med J</i> 2022;43:1057-61.                                                                                                                         |
| 50. | Ma K, Zhao D, Li X, et al. Case report: Multiple brain metastases of atrial myxoma: clinical experience and literature review. <i>Front Neurol</i> 2023;13:1046441.                                                                                                   |
| 51. | Samia AM, Boyer PJ. Atrial myxoma presenting with hemorrhage and multifocal infarcts in the brain of a 59-year-old man: an uncommon outcome for the most common primary heart neoplasm. <i>Cureus</i> 2023;15:e41323.                                                 |
| 52. | Abdow Iii VP, Breton JM, Nayar WV. Multiple craniotomies for the resection of symptomatic multifocal intracranial metastatic cardiac myxoma: a case report. <i>Surg Neurol Int</i> 2023;14:322.                                                                       |
